# Supplementary material for: Dinuclear NHC–gold(i)–thiolato and –alkynyl complexes: synthesis, anticancer activity, and catalytic activity in lactonization reactions
Source: Royal Society of Chemistry journal article supplement (doi:10.1039/d4dt00890a), 2024-01-01
Supplement: d4dt00890a1.pdf [file d4dt00890a1.pdf]

## **Dinuclear NHC-gold(I)-thiolato and -alkynyl complexes: synthesis, anticancer activity, and catalytic activity in lactonization reactions**

Xinyuan Ma, †<sup>a,c</sup> Yuan Zhao †<sup>a</sup>, Isabella Caligiuri,<sup>b</sup> Flavio Rizzolio,<sup>b,c</sup> Nestor Bracho Pozsoni,<sup>a</sup> Kristof Van Hecke,<sup>a</sup> Thomas Scattolin\*<sup>d</sup>, and Steven P. Nolan <sup>a\*</sup>

<sup>a</sup>*Department of chemistry and centre for sustainable chemistry Ghent University, Krijgslaan 281. S-3. 9000 Ghent (Belgium). E-mail: [steven.nolan@ugent.be](mailto:steven.nolan@ugent.be).*

<sup>b</sup>*Pathology Unit, Centro di Riferimento Oncologico di Aviano (C.R.O.) IRCCS via Franco Gallini 2, 33081, Aviano, Italy.*

<sup>c</sup>*Dipartimento di Scienze Molecolari e Nanosistemi, Università Ca' Foscari, Campus Scientifico Via Torino 155, 30174 Venezia-Mestre (Italy).*

<sup>d</sup>*Dipartimento di Scienze Chimiche, Università degli Studi di Padova, via Marzolo 1, 35131 Padova (Italy). E-mail: [thomas.scattolin@unipd.it](mailto:thomas.scattolin@unipd.it)*

<sup>e</sup>*Chemical Science and Technology Research Institute, Sinochem Group, 20 Xueyuan Road, Haidian District, 100083 Beijing.*

### **Table of Contents**

|                                    |            |
|------------------------------------|------------|
| <b>X-ray Crystallography .....</b> | <b>S2</b>  |
| <b>NMR spectra.....</b>            | <b>S4</b>  |
| <b>References.....</b>             | <b>S18</b> |

## X-ray Crystallography

The crystal that was of suitable quality for single crystal X-ray diffraction analysis were obtained by slow vapor diffusion of the antisolvent (pentane) into saturated solutions of the complexes (in dichloromethane) at 4 °C. CCDC 2341052 contain the supplementary crystallographic data for this paper. These data can be obtained free of charge from The Cambridge Crystallographic Data Centre via [www.ccdc.cam.ac.uk/structures](http://www.ccdc.cam.ac.uk/structures).

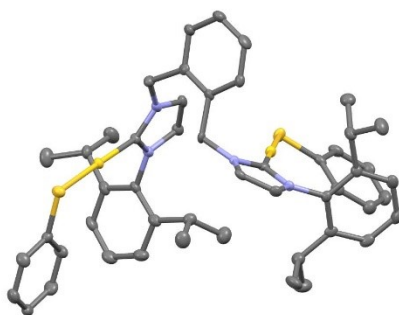

**Figure S1** X-ray molecular structure of **2a**, showing thermal displacement ellipsoids at the 50% probability level and hydrogen atoms omitted for clarity.

**Table S1** Crystal data and structure refinement for **2a**

|                                  |                                                                               |
|----------------------------------|-------------------------------------------------------------------------------|
| Identification code              | <b>2a</b>                                                                     |
| Empirical formula                | C <sub>50</sub> H <sub>56</sub> Au <sub>2</sub> N <sub>4</sub> S <sub>2</sub> |
| Formula weight                   | 1171.04                                                                       |
| Temperature/K                    | 100(2)                                                                        |
| Crystal system                   | triclinic                                                                     |
| Space group                      | P-1                                                                           |
| a/Å                              | 9.7037(2)                                                                     |
| b/Å                              | 14.9460(4)                                                                    |
| c/Å                              | 16.9881(5)                                                                    |
| $\alpha$ /°                      | 110.305(2)                                                                    |
| $\beta$ /°                       | 101.236(2)                                                                    |
| $\gamma$ /°                      | 92.613(2)                                                                     |
| Volume/Å <sup>3</sup>            | 3 2249.19(11)                                                                 |
| Z                                | 2                                                                             |
| $\rho_{\text{calc}}/\text{cm}^3$ | 1.729                                                                         |
| $\mu/\text{mm}^{-1}$             | 6.647                                                                         |
| F(000)                           | 1148.0                                                                        |

|                                                        |                                                   |
|--------------------------------------------------------|---------------------------------------------------|
| Crystal size/mm <sup>3</sup>                           | 0.35 × 0.26 × 0.07                                |
| Radiation                                              | Mo Kα(λ = 0.71073)                                |
| 2θ range for data collection/°                         | 5.148 to 57.522                                   |
| Index ranges                                           | -13 ≤ h ≤ 12, -19 ≤ k ≤ 20, -20 ≤ l ≤ 22          |
| Reflections collected                                  | 44349                                             |
| Independent reflections                                | 10251 [Rint = 0.0727, Rsigma = 0.0691]            |
| Data/restraints/parameters                             | 10251/6/531                                       |
| Goodness-of-fit on F <sup>2</sup>                      | 1.027                                             |
| Final R indexes [I ≥ 2σ (I)]                           | R <sub>1</sub> = 0.0384, wR <sub>2</sub> = 0.0683 |
| Final R indexes [all data]                             | R <sub>1</sub> = 0.0592, wR <sub>2</sub> = 0.0767 |
| Largest diff. peak/hole / e Å <sup>-3</sup> 2.00/-1.43 |                                                   |



$^1\text{H}$ ,  $^{13}\text{C}$  { $^1\text{H}$ } apt of  $[(\text{IPr})^m\text{-xylene}(\text{AuSPh})_2]$  (**2b**)

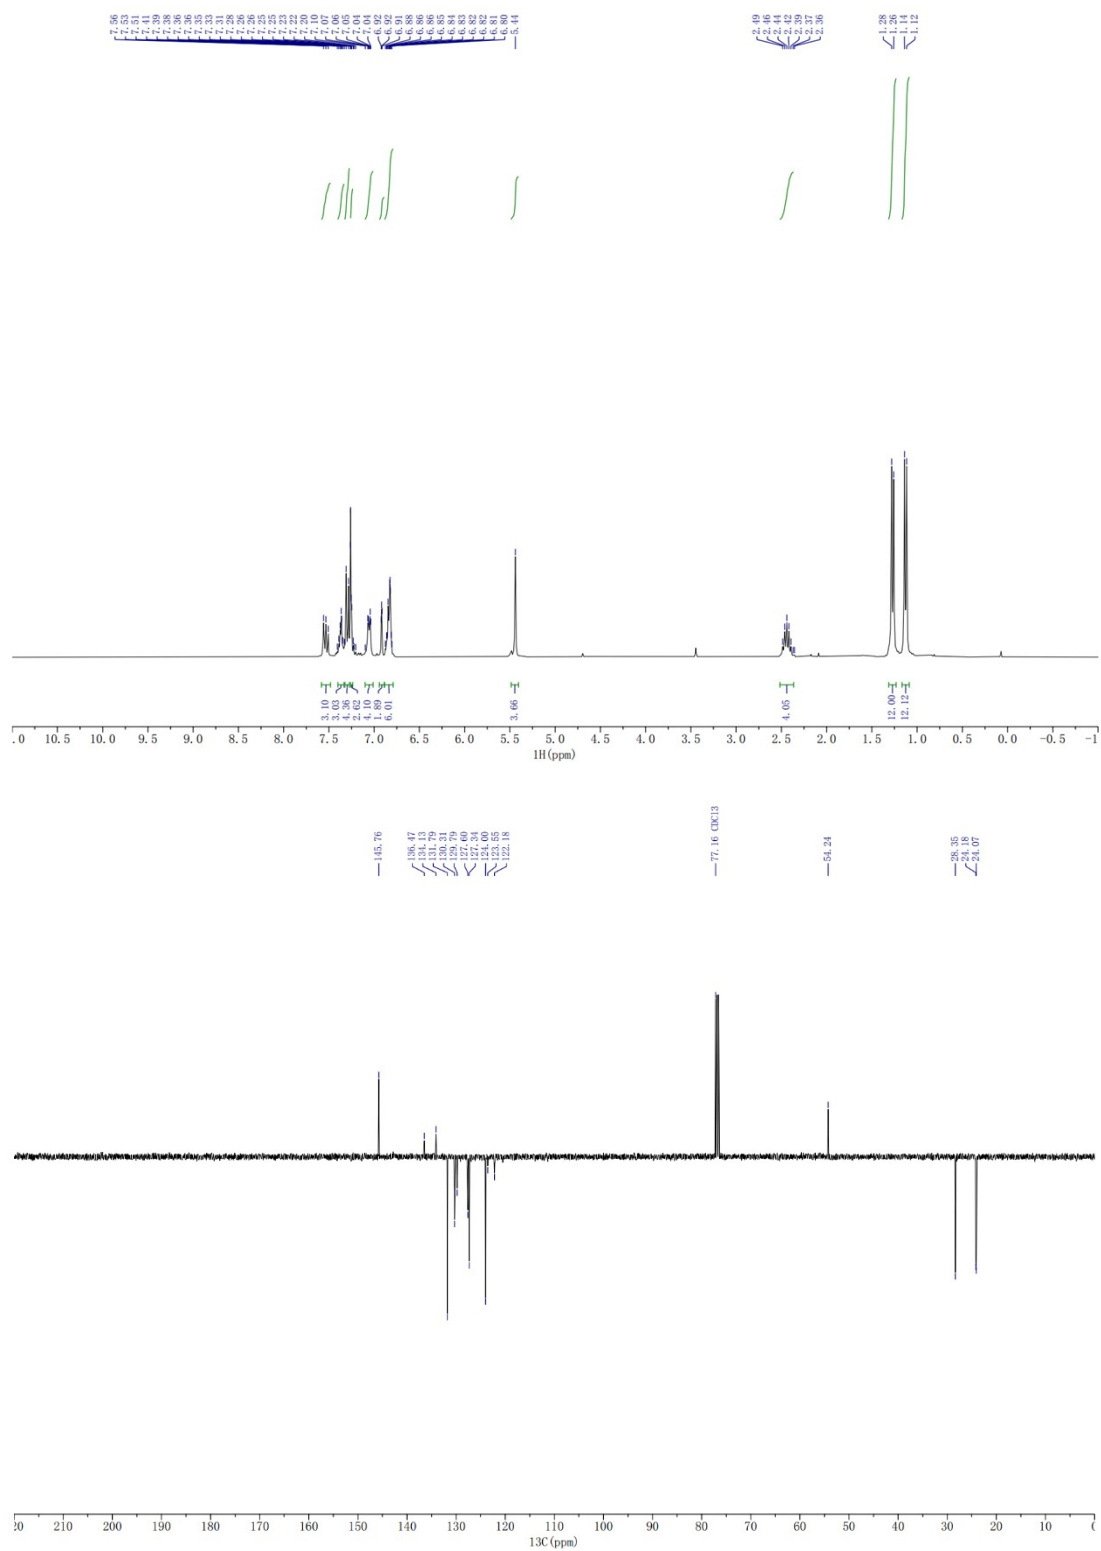

**$^1\text{H}$ ,  $^{13}\text{C}$  { $^1\text{H}$ } apt and 2D NMR of  $[(\text{IMes})\text{-}\rho\text{-xylene}(\text{AuSPh})_2]$  (**2c**)**

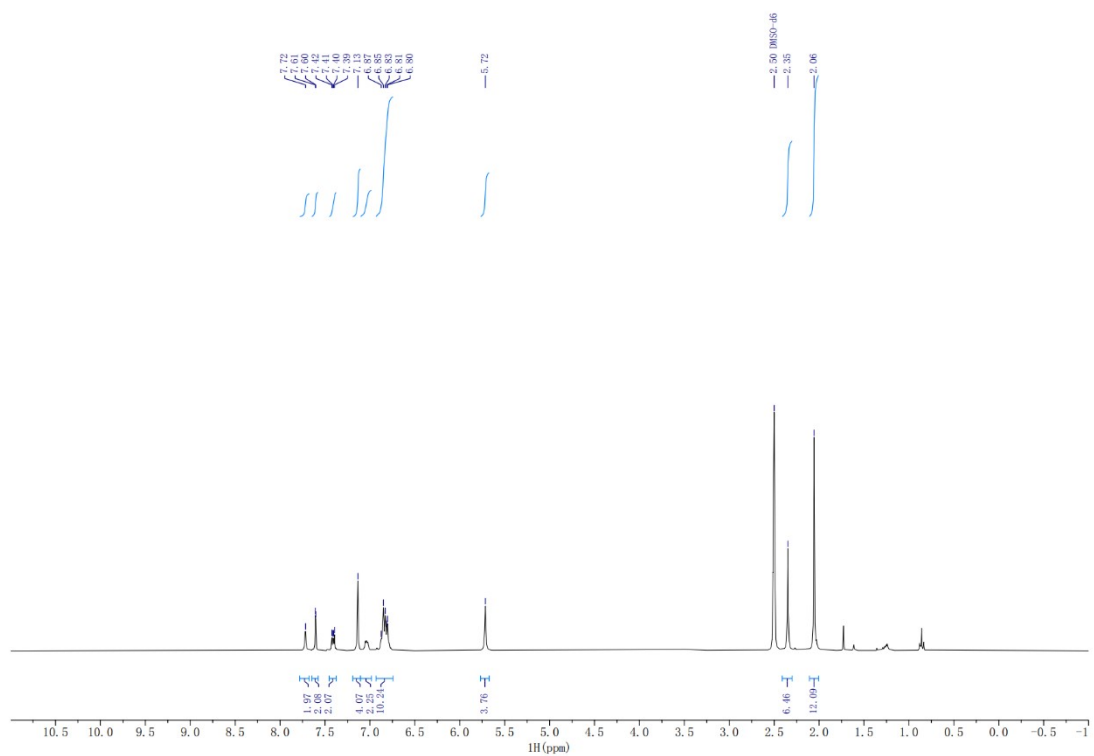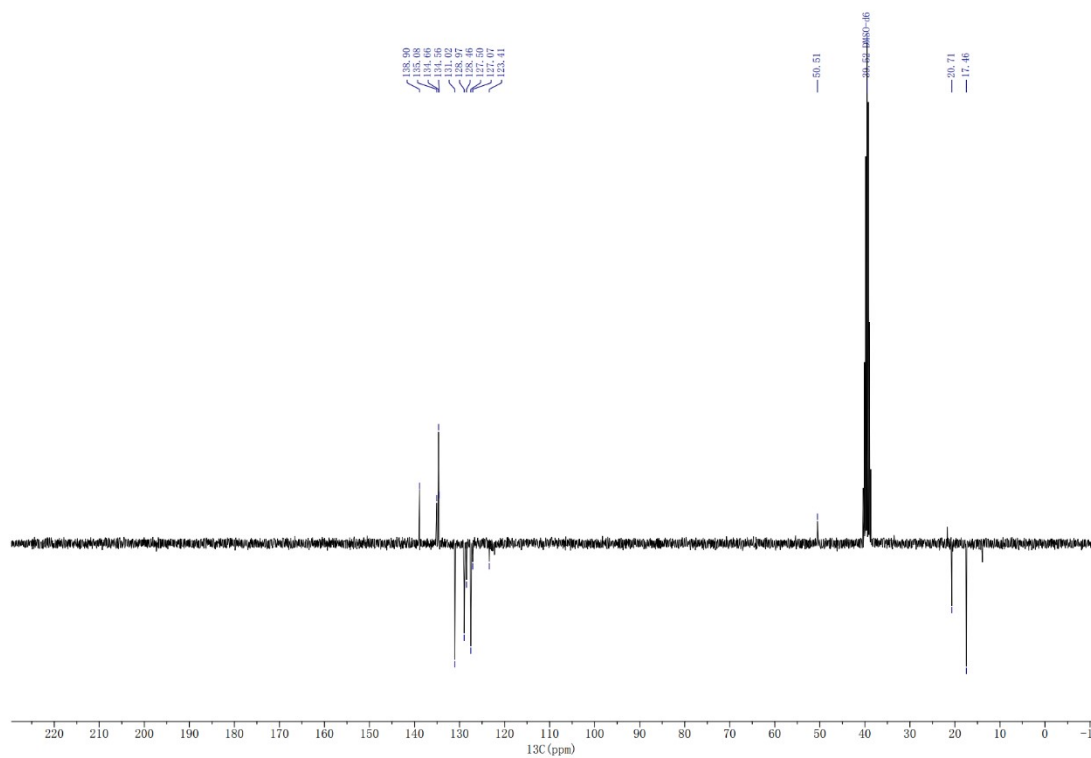

# $^1\text{H}$ , $^{13}\text{C}$ { $^1\text{H}$ } apt and 2D NMR of [(IMes) $^m$ -xylene(AuSPh) $_2$ ] (2d)

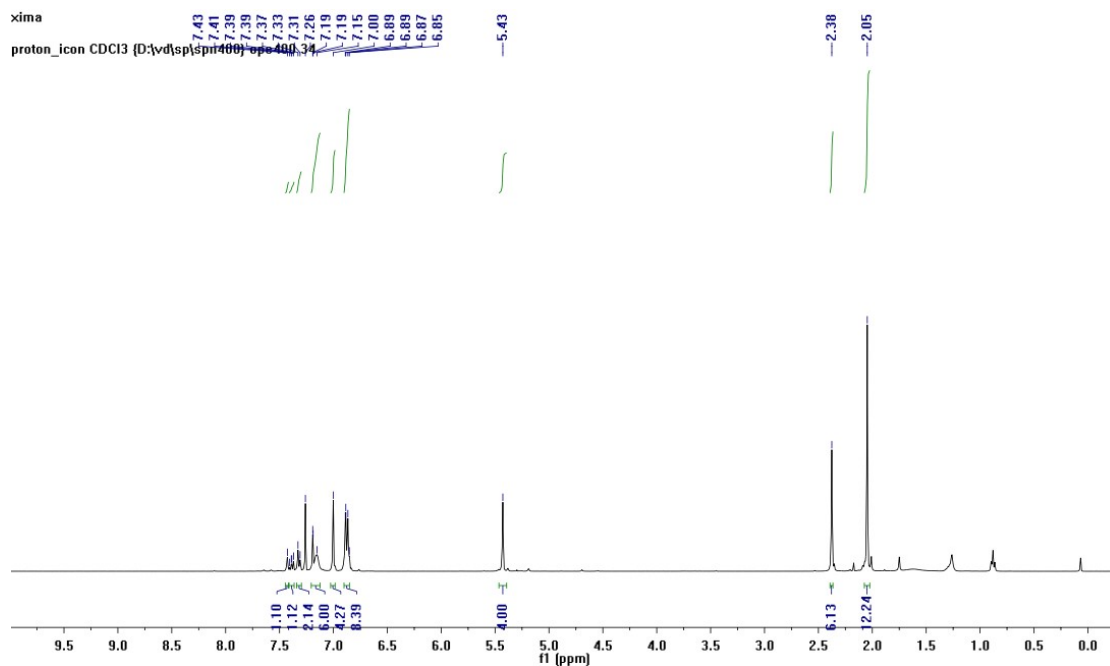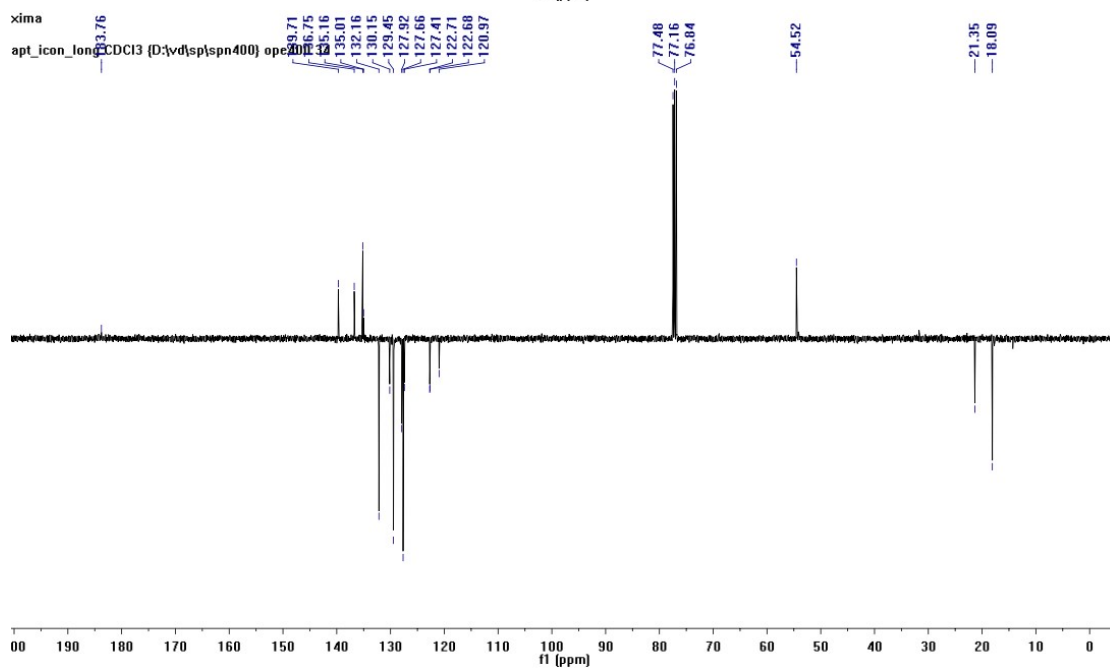

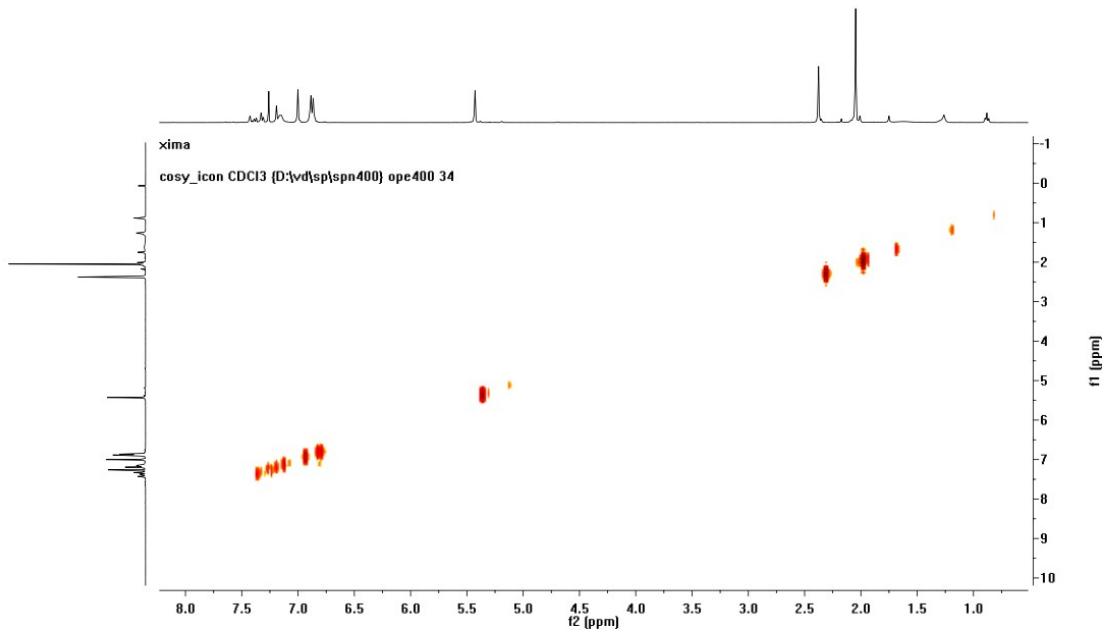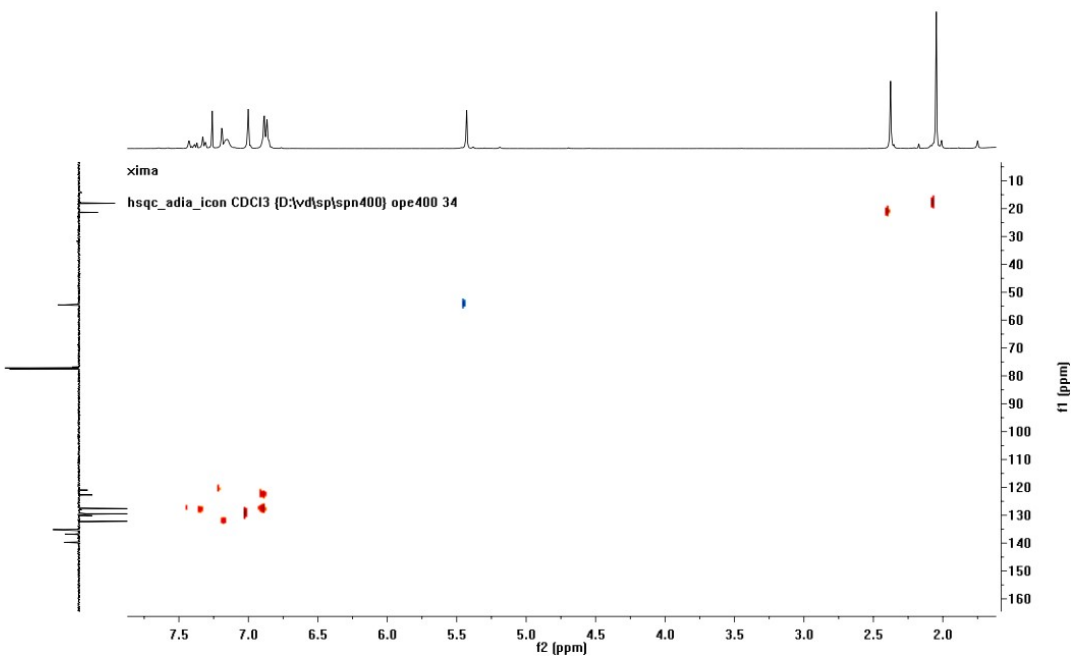



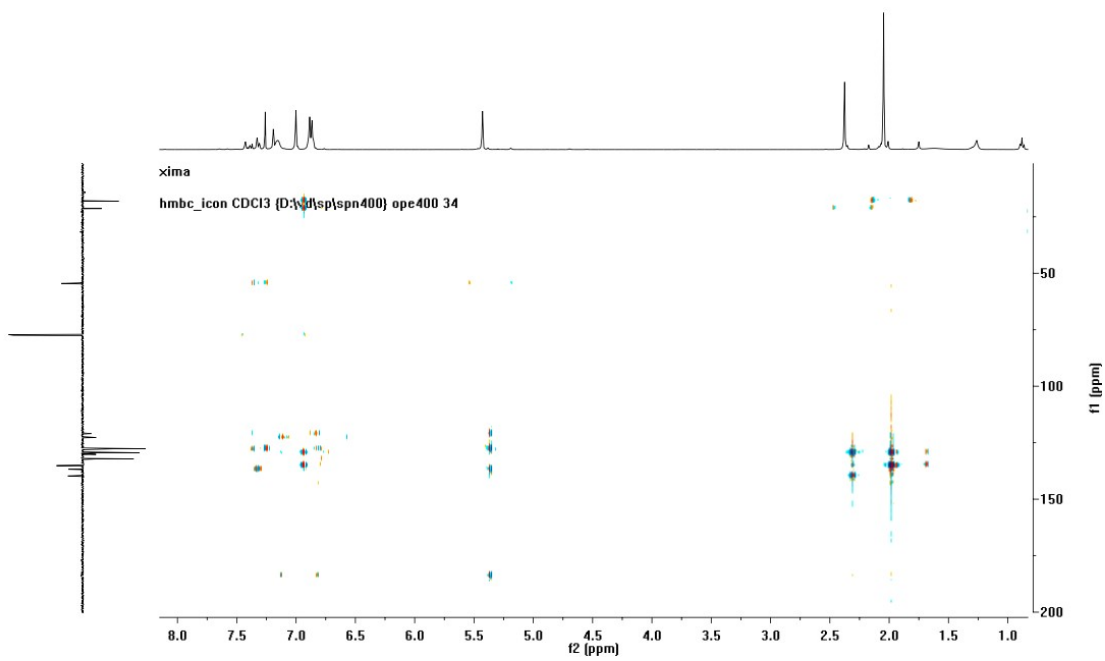

$^1\text{H}$ ,  $^{13}\text{C}$   $\{^1\text{H}\}$  apt and 2D NMR of  $[(\text{IMes})\text{-}p\text{-xylene}(\text{AuSPh})_2]$  (2e)

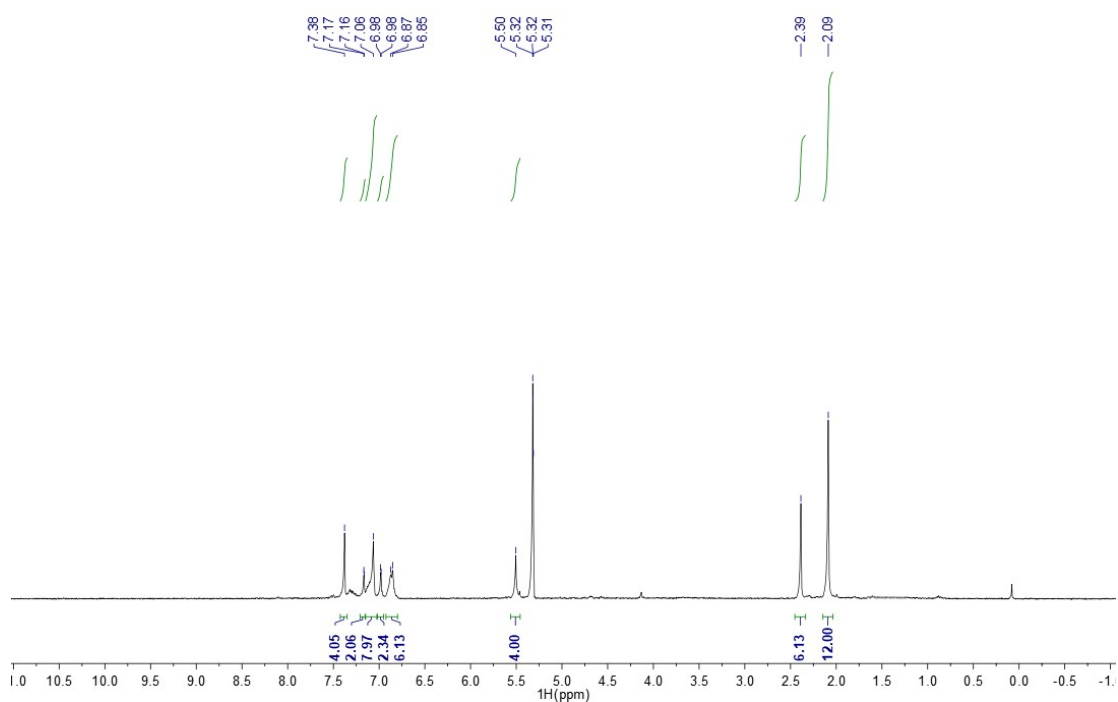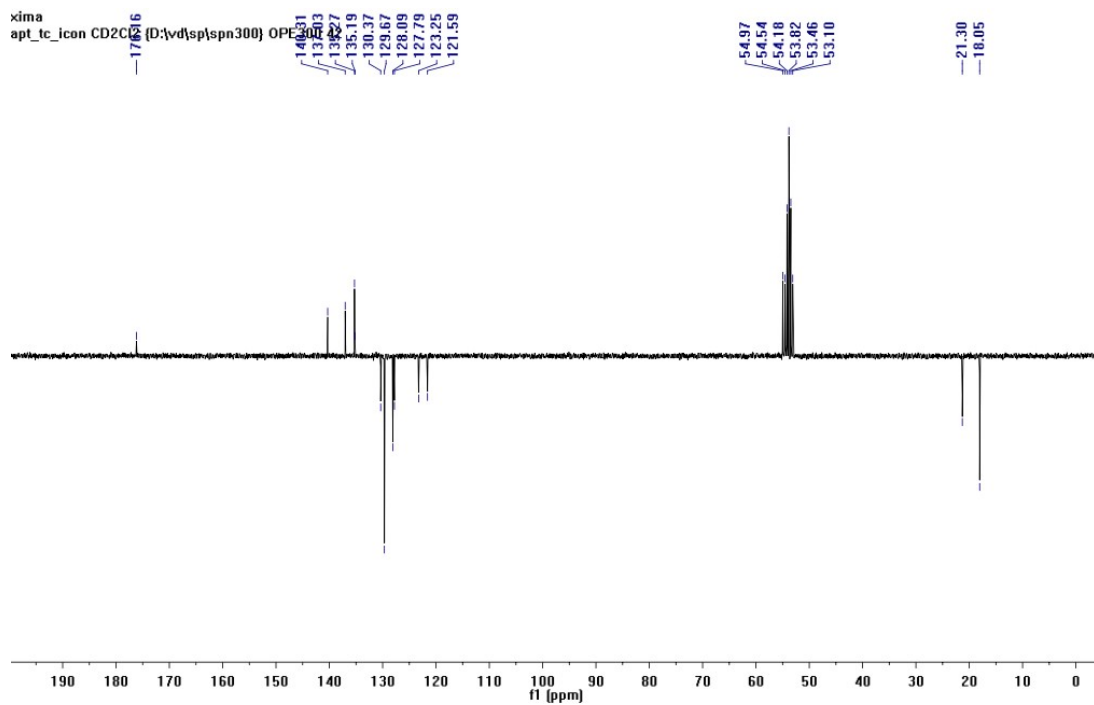

**$^1\text{H}$ ,  $^{13}\text{C}$   $\{^1\text{H}\}$  apt of  $[(\text{IPr})\text{-}o\text{-xylene}\{\text{Au}(\text{phenylethynyl})\}_2]$  (**3a**)**

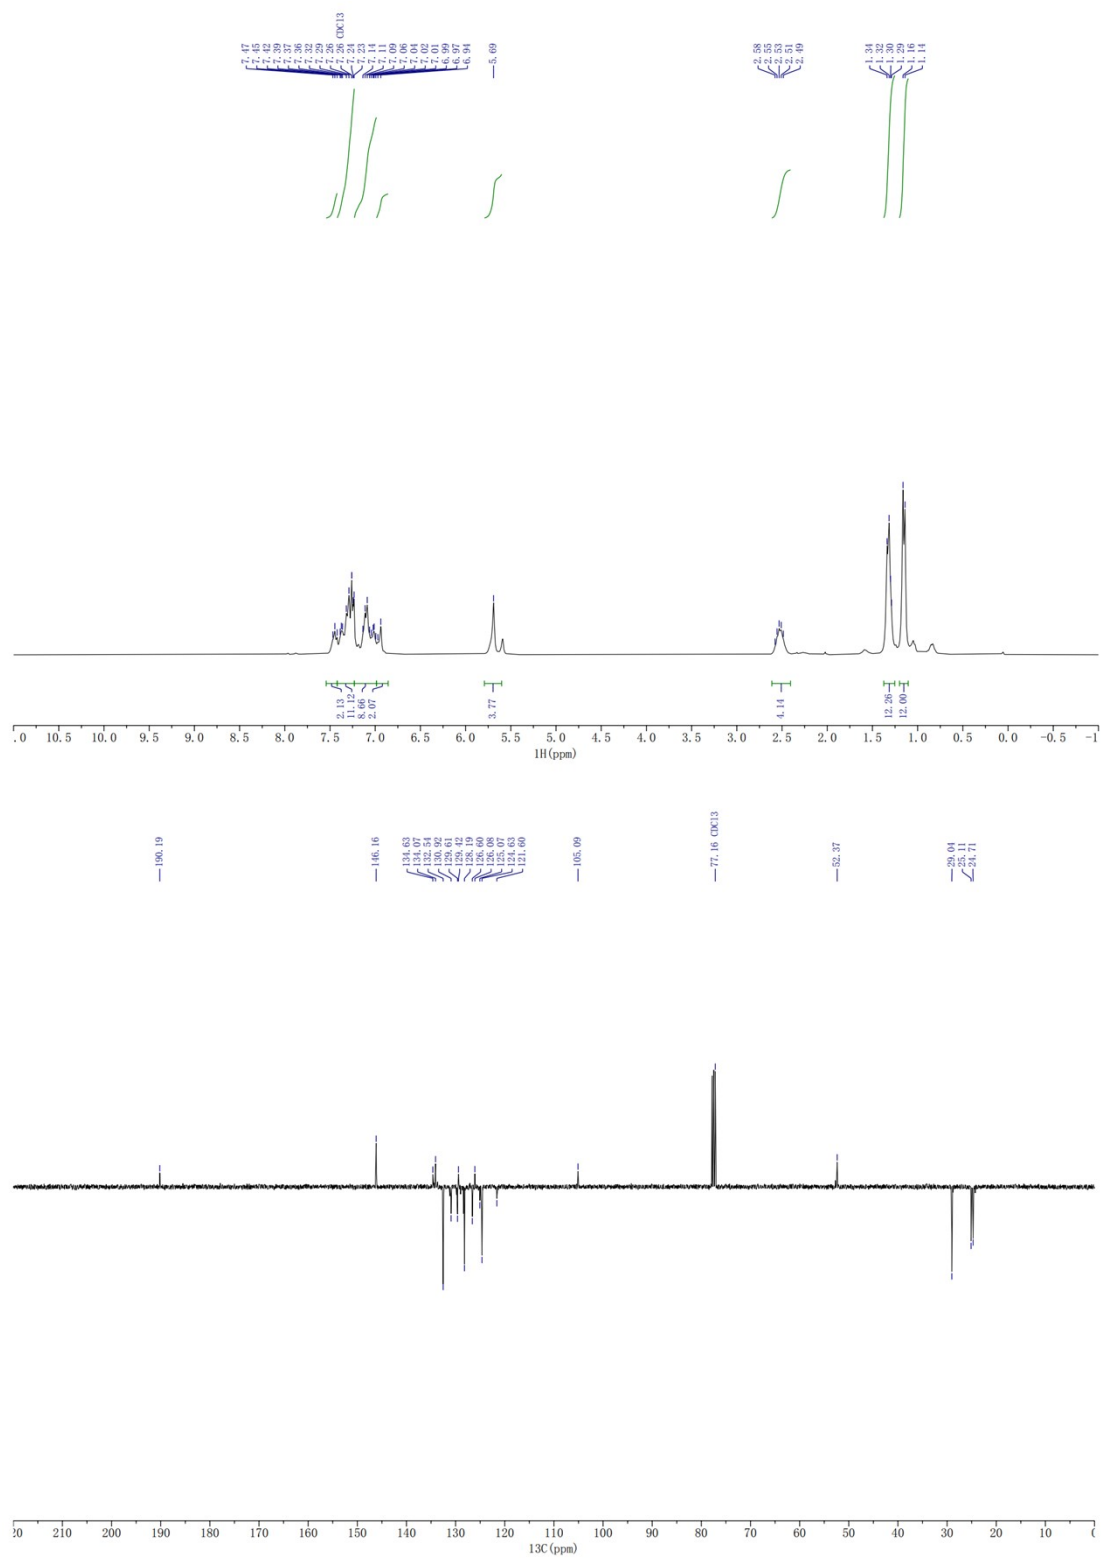

**$^1\text{H}$ ,  $^{13}\text{C}$   $\{^1\text{H}\}$  apt and 2D NMR of  $[(\text{IPr})^{o\text{-xylene}}\{\text{Au}(4\text{-methoxyphenyl})\text{buta-1,3-diyne-1-yl}\}]_2$  (3b)**

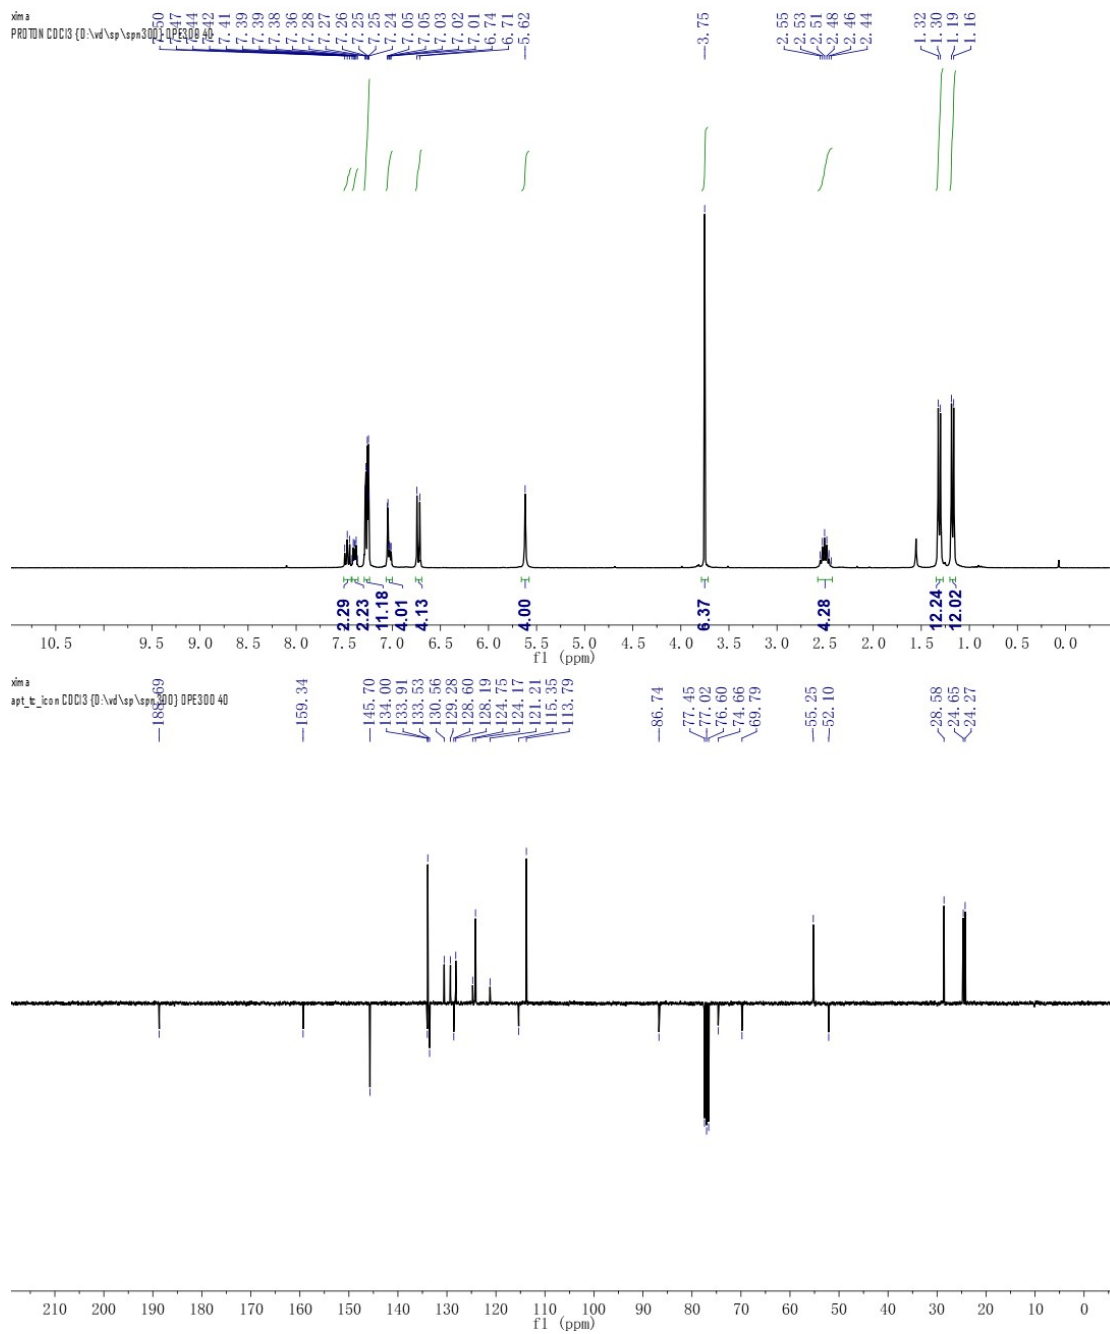

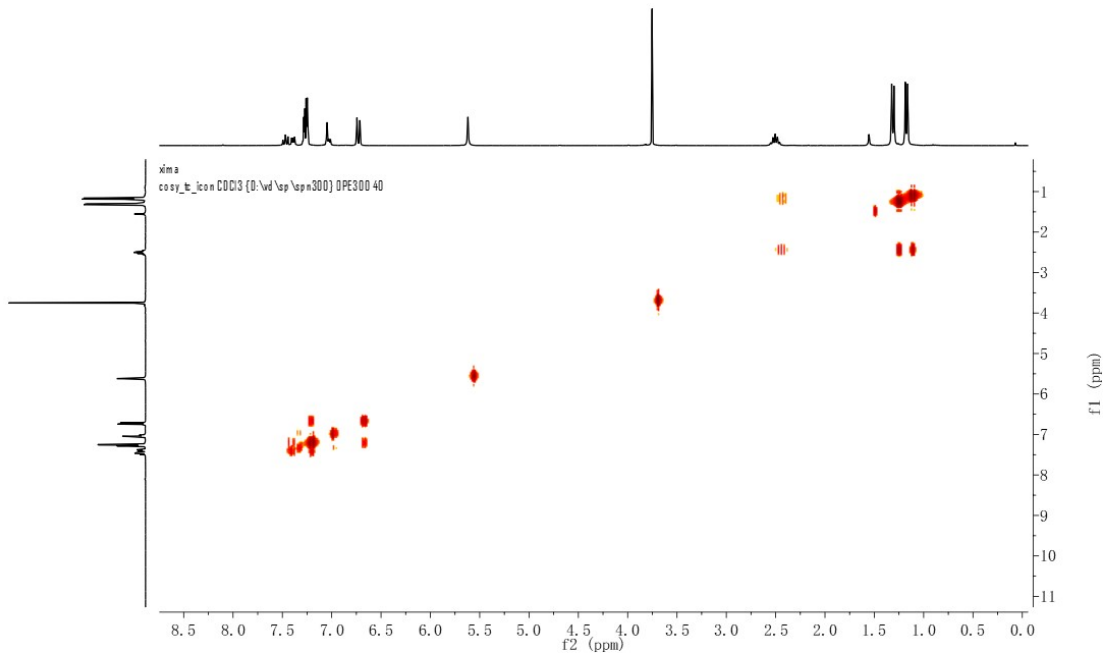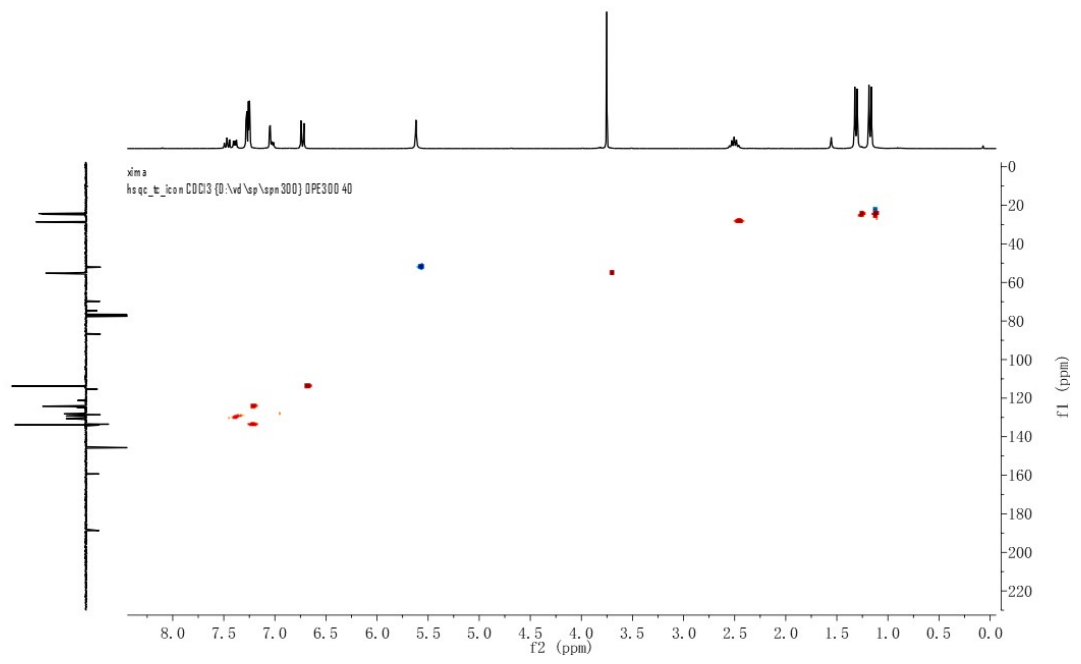

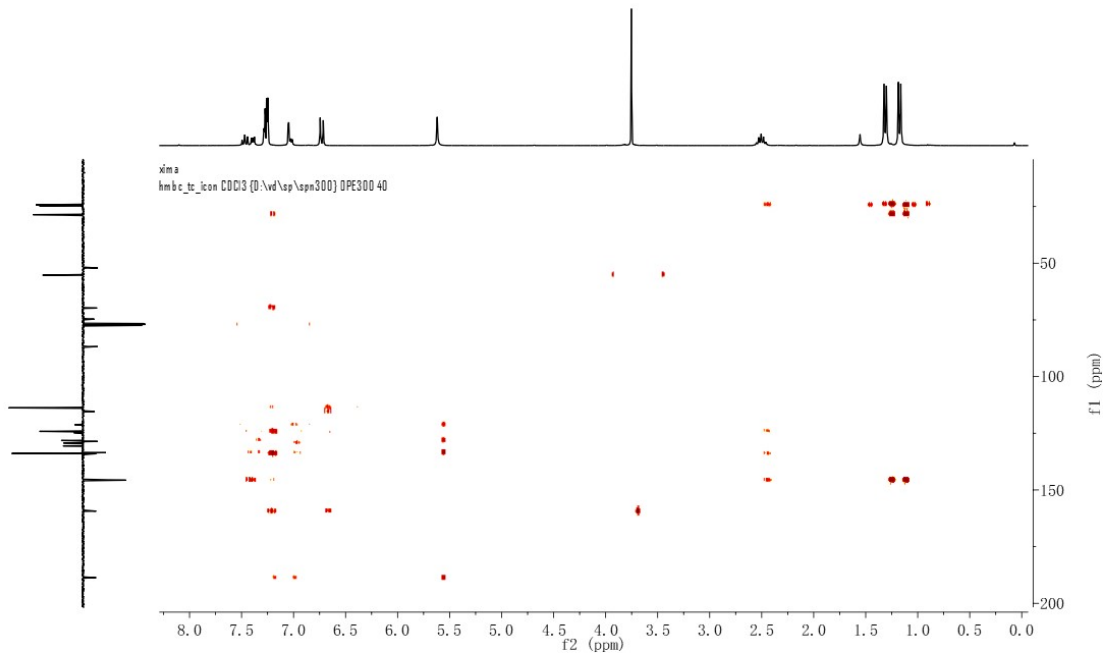

# $^1\text{H}$ NMR of alkynoic acid (4)<sup>1</sup>

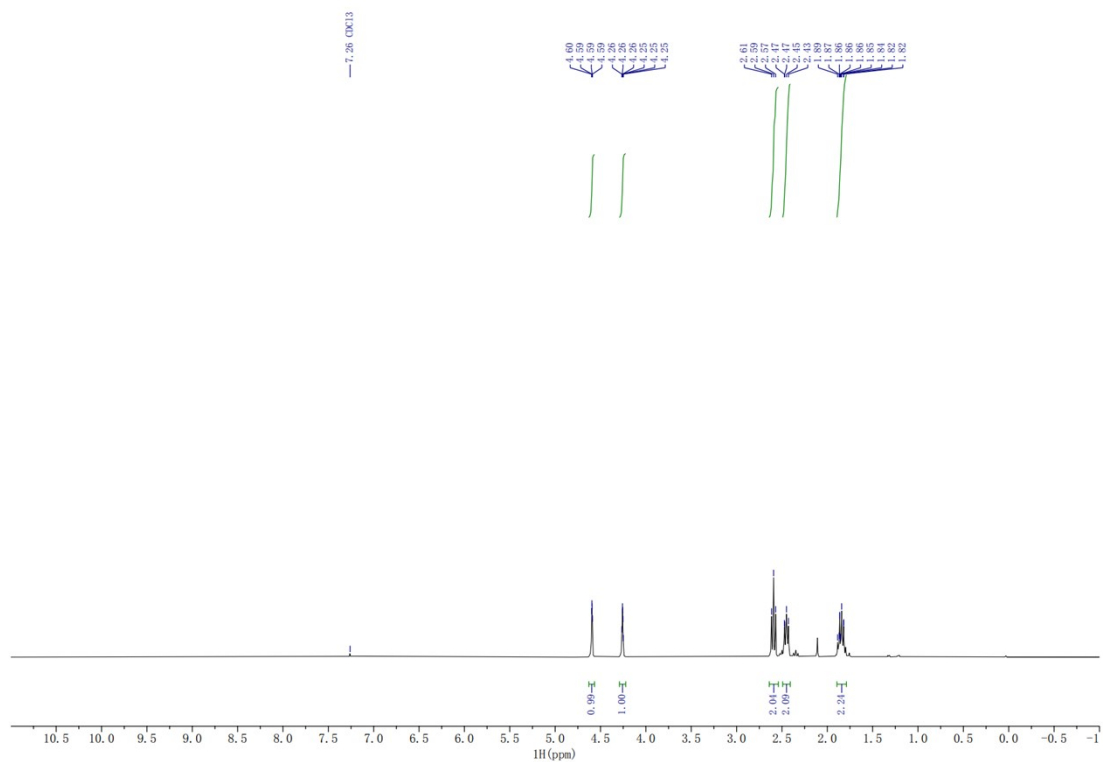

## Stability studies of complexes 2a-e in DMSO-d<sub>6</sub>

**2a**, <sup>1</sup>H NMR (300 MHz, DMSO-d<sub>6</sub>)  
Time = 0h

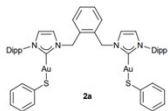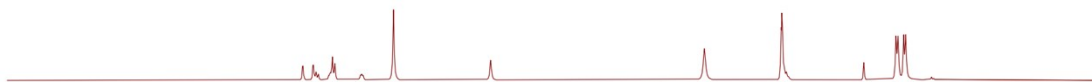

**2a**, <sup>1</sup>H NMR (300 MHz, DMSO-d<sub>6</sub>)  
Time = 24h

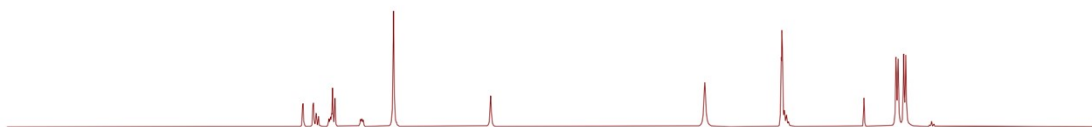

10.5 10.0 9.5 9.0 8.5 8.0 7.5 7.0 6.5 6.0 5.5 5.0 4.5 4.0 3.5 3.0 2.5 2.0 1.5 1.0 0.5 0.0 -0.5 -1.0  
1H (ppm)

**2b**, <sup>1</sup>H NMR (300 MHz, DMSO-d<sub>6</sub>)  
Time = 0h

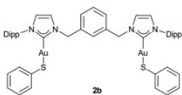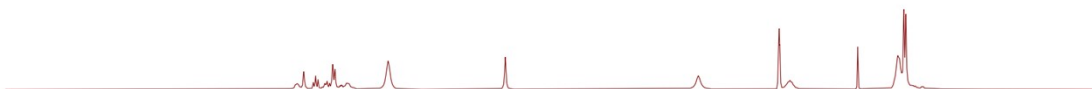

**2b**, <sup>1</sup>H NMR (300 MHz, DMSO-d<sub>6</sub>)  
Time = 24h

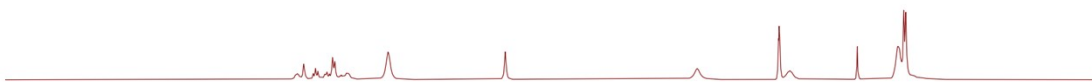

10.5 10.0 9.5 9.0 8.5 8.0 7.5 7.0 6.5 6.0 5.5 5.0 4.5 4.0 3.5 3.0 2.5 2.0 1.5 1.0 0.5 0.0 -0.5 -1.0  
1H (ppm)



**2c**, <sup>1</sup>H NMR (300 MHz, DMSO-*d*<sub>6</sub>)  
Time = 0h

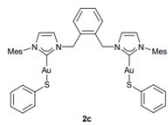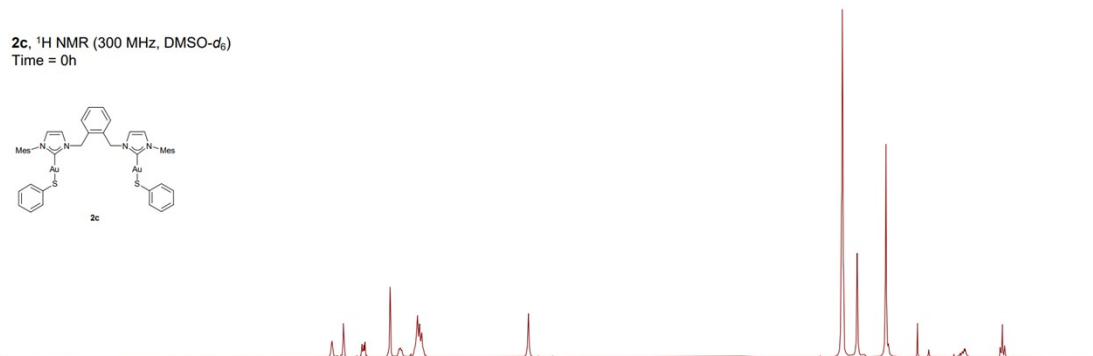

**2c**, <sup>1</sup>H NMR (300 MHz, DMSO-*d*<sub>6</sub>)  
Time = 24h

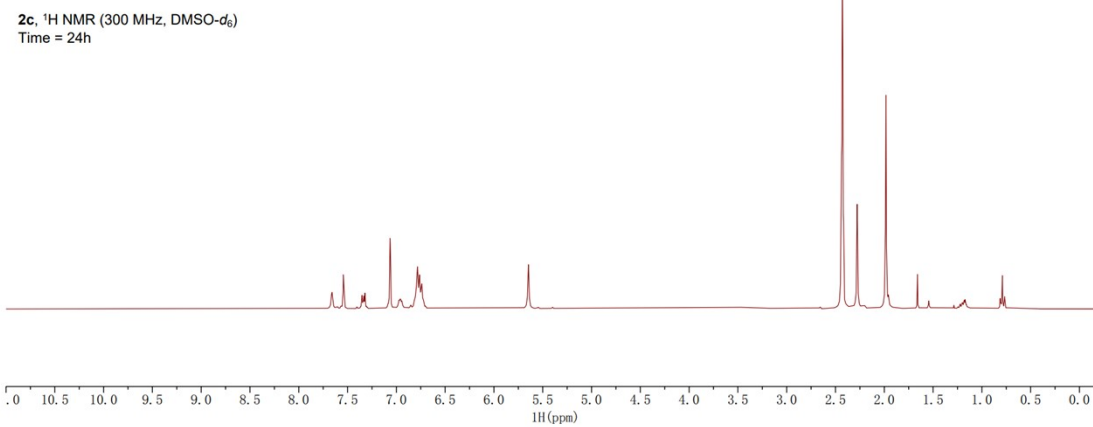

**2d**, <sup>1</sup>H NMR (300 MHz, DMSO-*d*<sub>6</sub>)  
Time = 0h

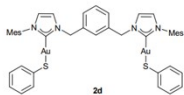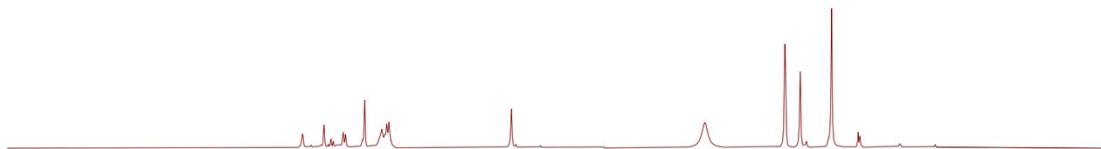

**2d**, <sup>1</sup>H NMR (300 MHz, DMSO-*d*<sub>6</sub>)  
Time = 24h

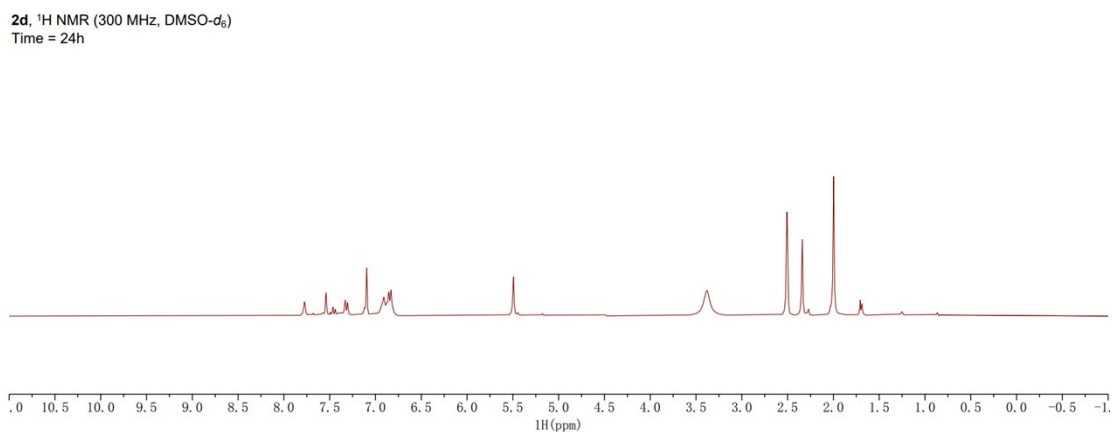

**2e**, <sup>1</sup>H NMR (300 MHz, DMSO-*d*<sub>6</sub>)  
Time = 0h

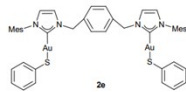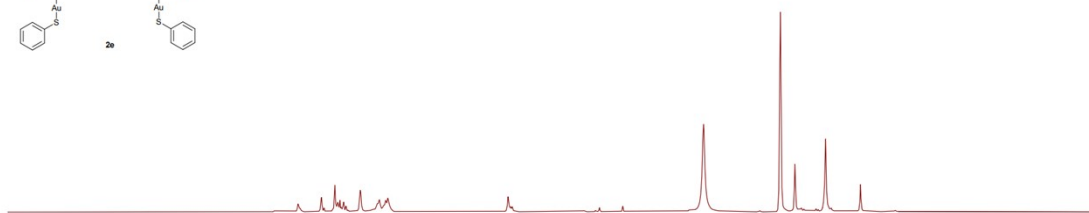

**2e**, <sup>1</sup>H NMR (300 MHz, DMSO-*d*<sub>6</sub>)  
Time = 24h

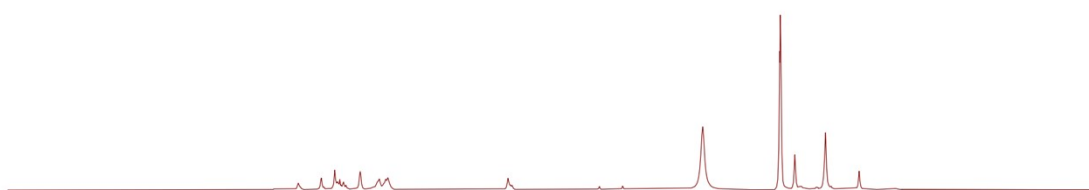

10.0 9.5 9.0 8.5 8.0 7.5 7.0 6.5 6.0 5.5 5.0 4.5 4.0 3.5 3.0 2.5 2.0 1.5 1.0 0.5 0.0 -0.5 -1.0  
<sup>1</sup>H (ppm)

## References

1. D. Gasperini, L. Maggi, S. Dupuy, R. M. P. Veenboer, D. B. Cordes, A. M. Z. Slawin and S. P. Nolan, *Adv. Synth. Catal.*, **2016**, 358, 3857–3862.
